# Supplementary material for: Increased Mild Vaccine-Related Side Effects and Higher Specific Antibody Titers in Health Care Workers with Previous SARS-CoV-2 Infection after the mRNA BNT162b2 Vaccine
Source: MDPI journal article supplement (doi:10.3390/vaccines10081238), 2022-08-02
Supplement: s1 [file s1]

**Supplemental Table S1. Number of side effects in the study population after the first vaccine dose, overall and stratified according to prior SARS-CoV-2 infection.**

| Number of side effects | First vaccine dose |                                          |             | <i>p</i>     |
|------------------------|--------------------|------------------------------------------|-------------|--------------|
|                        | Overall (n=1106)   | Previous SARS-CoV-2 infection Yes (n=83) | No (n=1023) |              |
| 0                      | 354 (32.0%)        | 18 (21.7%)                               | 336 (32.8%) | <b>0.021</b> |
| 1                      | 501 (45.3%)        | 36 (43.4%)                               | 465 (45.5%) |              |
| 2                      | 154 (13.9%)        | 16 (19.3%)                               | 138 (13.5%) |              |
| ≥ 3                    | 97 (8.8%)          | 13 (15.7%)                               | 84 (8.2%)   |              |

**Supplemental Table S2. Number of side effects after the first and second vaccine doses in the study population after case-control matching, overall and stratified according to prior SARS-CoV-2 infection.**

| N° of side effects | First vaccine dose            |            |            |              | Second vaccine dose           |            |            |              |
|--------------------|-------------------------------|------------|------------|--------------|-------------------------------|------------|------------|--------------|
|                    | Previous SARS-CoV-2 infection |            |            | <i>p</i>     | Previous SARS-CoV-2 infection |            |            | <i>p</i>     |
|                    | Overall (n=249)               | Yes (n=83) | No (n=166) |              | Overall (n=239)               | Yes (n=82) | No (n=157) |              |
| 0                  | 64 (25.7%)                    | 18 (21.7%) | 46 (27.7%) | <b>0.028</b> | 50 (20.9%)                    | 20 (24.4%) | 30 (19.1%) | <b>0.133</b> |
| 1                  | 123 (49.4%)                   | 36 (43.4%) | 87 (52.4%) |              | 68 (28.4%)                    | 29 (35.4%) | 39 (23.8%) |              |
| 2                  | 40 (16.1%)                    | 16 (19.3%) | 24 (14.5%) |              | 48 (20.1%)                    | 14 (17.1%) | 34 (21.6%) |              |
| ≥ 3                | 22 (8.8%)                     | 13 (15.7%) | 9 (5.4%)   |              | 73 (30.5%)                    | 19 (23.2%) | 54 (34.4%) |              |

Information on side effects after second vaccine dose is missing for 10 subjects (1 with prior infection and 9 without).
